# Supplementary material for: The Devil Is in the Details: Incomplete Reporting in Preclinical Animal Research
Source: PubMed Central journal article supplement (PMC5113978; doi:10.1371/journal.pone.0166733), 2016-11-17
Supplement: pone.0166733.s015.pdf [file pone.0166733.s015.pdf]

**Supplementary Table 2. Operationalized Reporting sub-items from the ARRIVE Guidelines and Examples**

| ARRIVE Section | ARRIVE # and <i>item</i>   | sub-items                                                            | Examples                                                                 |
|----------------|----------------------------|----------------------------------------------------------------------|--------------------------------------------------------------------------|
| Title          | <i>1 title</i>             | 1.1 species studied                                                  | 1.1 Mice, or Murine etc.                                                 |
|                |                            | 1.2 disease modeled                                                  | 1.2 Acute lung injury or sepsis etc.                                     |
|                |                            | 1.3 intervention tested                                              | 1.3 MSCs etc.                                                            |
| Abstract       | <i>2 abstract</i>          | 2.1 the objective or hypothesis                                      | 2.1 Any objective or hypothesis                                          |
|                |                            | 2.2 disease model is stated in the objective or hypothesis           | 2.2 e.g. acute lung injury; but must be included in objective/hypothesis |
|                |                            | 2.3 intervention is stated in the objective or hypothesis            | 2.3 e.g. MSCs; but must be included in objective/hypothesis              |
|                |                            | 2.4 the species or strain studied is stated anywhere in the abstract | 2.4 e.g. Mice or murine; can be located anywhere in abstract             |
| Introduction   | <i>3 background</i>        | removed                                                              |                                                                          |
|                | <i>4 objectives</i>        | 4.1 the objective or hypothesis is stated                            | 4.1 Any statement indicating the objective/hypothesis will suffice       |
| Methods        | <i>5 ethical statement</i> | 5.1 explicit statement of approval                                   | 5.1 e.g. "All experimental animal procedures were                        |
|                |                            | 5.2 approval body name                                               | approved by the Institute of Animal Care and Use                         |
|                |                            | 5.3 name of international, national or                               | Committee..."                                                            |

|                       |                                                                                                                                          |                                                                                                                                                                                                            |
|-----------------------|------------------------------------------------------------------------------------------------------------------------------------------|------------------------------------------------------------------------------------------------------------------------------------------------------------------------------------------------------------|
|                       | institutional guidelines followed                                                                                                        | 5.2 e.g. "... by the Institute of Animal Care and Use                                                                                                                                                      |
|                       | 5.4 list an ethics protocol/permit number                                                                                                | Committee at Kaohsiung Chang Gung Memorial Hospital                                                                                                                                                        |
|                       |                                                                                                                                          | 5.3 e.g. "...and performed in accordance with the Guide for the Care and Use of Laboratory Animals." Can be any guidelines and can be listed by name or more generally such as 'institutional guidelines'. |
|                       |                                                                                                                                          | 5.4 e.g. "Affidavit of Approval of Animal Use Protocol No. 2008121108"                                                                                                                                     |
| <i>6 study design</i> | 6.1 the total number of experimental and control groups is listed                                                                        | 6.1 e.g. "Rats were randomly assigned to one of three experimental groups".                                                                                                                                |
|                       | 6.2. the # of <i>in vivo</i> experimental and control groups assigned to a receive treatment is internally consistent within the methods | 6.2 e.g. "Rats were randomly assigned to one of three experimental groups 1) saline solution plus saline treatment (n=5), 2) LPS plus saline treatment (n=5), and 3) LPS plus hATSCs treatment (n=5)."     |
|                       | 6.3 the # of <i>in vivo</i> experimental and control groups assigned to receive treatment is consistent between the methods and results  | 6.3 If there are three groups (as in example 6.1) there must be 3, and only 3 groups, in the results section.                                                                                              |
|                       |                                                                                                                                          | 6.4 e.g. "In the study, n refers to number of animals..."                                                                                                                                                  |
|                       |                                                                                                                                          | 6.5 Personnel are reported as blinded for at least one task,                                                                                                                                               |

|                                          |                                    |                                                                                                     |
|------------------------------------------|------------------------------------|-----------------------------------------------------------------------------------------------------|
|                                          | 6.4 the experimental unit          | or why blinding is not conducted is reported                                                        |
|                                          | 6.5 blinding of personnel          | 6.6 An assessor is blinded for at least one of the outcomes                                         |
|                                          | 6.6 blinding of outcome assessment | measured, or why blinding is not conducted is reported                                              |
|                                          | 6.7 diagram of experimental design | 6.7 Any diagram for any aspect of the experimental design that includes assigning animals treatment |
| <i>7 experimental procedures (model)</i> | 7.1 drug                           | 7.1 (e.g. Lipopolysaccharide)                                                                       |
|                                          | 7.2 drug vehicle                   | 7.2 (e.g. PBS)                                                                                      |
|                                          | 7.3 drug vehicle Volume            | 7.3 (e.g. 100 µL)                                                                                   |
|                                          | 7.4 drug dose                      | 7.4 (e.g. 10mg/kg)                                                                                  |
|                                          | 7.5 route                          | 7.5 (e.g. intravenous)                                                                              |
|                                          | 7.6 site                           | 7.6 (e.g. tail vein)                                                                                |
|                                          | 7.7 supplier                       | 7.7 (e.g. Sigma Aldrich)                                                                            |
|                                          | 7.8 when                           | 7.8 (e.g. "Except the burrowing assay, which was                                                    |
|                                          | 7.9 where                          | conducted from the beginning of the dark cycle, all other                                           |
|                                          | 7.10 was anesthesia use reported   | behavioural experiments were conducted in the light                                                 |
|                                          | 7.11 anesthesia (route)            | phase")                                                                                             |
|                                          | 7.12 anesthesia (type)             | 7.9 (e.g. home cage, laboratory, etc.)                                                              |
|                                          | 7.13 anesthesia (dose)             | 7.10 (e.g. Rats were anesthetized...)                                                               |

|                                                   |                                                       |                                                                                                               |
|---------------------------------------------------|-------------------------------------------------------|---------------------------------------------------------------------------------------------------------------|
|                                                   | 7.14 was analgesia use reported                       | 7.11 (e.g. intravenous)<br>7.12 (e.g. isoflurane)<br>7.13 (e.g. xx mg/kg)<br>7.14 (e.g. We used analgesia...) |
| <i>7 experimental procedures</i><br><i>(MSCs)</i> | 7.1 MSC species source                                | 7.1 (e.g. Xenogenic Human)                                                                                    |
|                                                   | 7.2 MSC species source sex                            | 7.2 (e.g. Male)                                                                                               |
|                                                   | 7.3 MSC tissues type                                  | 7.3 (e.g. Adipose, Bone Marrow, etc.)                                                                         |
|                                                   | 7.4 MSC source supplier                               | 7.4 (e.g. State Stem Cell Industry Base)                                                                      |
|                                                   | 7.5 MSC vehicle                                       | 7.5 (e.g. PBS)                                                                                                |
|                                                   | 7.6 MSC vehicle volume                                | 7.6 (e.g. MSC per/mL)                                                                                         |
|                                                   | 7.7 MSC dose                                          | 7.7 (e.g. 50,000/mL)                                                                                          |
|                                                   | 7.8 MSC route                                         | 7.8 (e.g. intravenous)                                                                                        |
|                                                   | 7.9 MSC site                                          | 7.9 (e.g. tail vein)                                                                                          |
|                                                   | 7.10 MSC frequency of administration                  | 7.10 (Once, Twice etc.)                                                                                       |
|                                                   | 7.11 MSC when                                         | 7.11 (e.g. time after model inducement)                                                                       |
|                                                   | 7.12 MSC where                                        | 7.12 (e.g. home cage, laboratory, etc.)                                                                       |
|                                                   | 7.13 MSC rationale for drug dose or timing<br>of dose | 7.13 (any explanation will do)                                                                                |

---

|                                                 |                                            |                                        |
|-------------------------------------------------|--------------------------------------------|----------------------------------------|
| <i>7 experimental procedures<br/>(controls)</i> | 7.1 control drug                           | 7.1 (e.g. Normal Saline)               |
|                                                 | 7.2 control dose                           | 7.2 (e.g. 100mL or 1mL/kg)             |
|                                                 | 7.3 control route of administration (type) | 7.3 (e.g. Intravenous)                 |
|                                                 | 7.4 control site of administration         | 7.4 (e.g. Tail Vein)                   |
|                                                 | 7.5 control frequency of administration    | 7.5 (e.g. Once, Twice etc.)            |
|                                                 | 7.6 control when                           | 7.6 (e.g. time after model inducement) |
|                                                 | 7.7 control where                          | 7.7 (e.g. home cage, laboratory, etc.) |

---

|                                                   |                            |                                                    |
|---------------------------------------------------|----------------------------|----------------------------------------------------|
| <i>7 experimental procedures<br/>(euthanasia)</i> | 7.1 euthanasia reported    | 7.1 (do the authors indicate that the animals were |
|                                                   | 7.2 euthanasia method      | sacrificed/euthanized etc.?)                       |
|                                                   | 7.3 analgesia use reported | 7.2 (e.g. exsanguination)                          |
|                                                   |                            | 7.3 (e.g. We used analgesia...)                    |

---

|                               |                    |                                         |
|-------------------------------|--------------------|-----------------------------------------|
| <i>8 experimental animals</i> | 8.1 animal species | 8.1 (Latin or common name)              |
|                               | 8.2 strain         | 8.2 (international strain nomenclature) |
|                               | 8.3 sex            | 8.3 (male or female)                    |
|                               | 8.4 age            | 8.4 (all animals: mean or median)       |
|                               | 8.5 age            | 8.5 (all animals: range)                |
|                               | 8.6 weight         | 8.6 (all animals: mean or median)       |
|                               | 8.7 weight         | 8.7 (all animals: range)                |

---

|                                |                                                                        |                                                                                                                                                                                    |
|--------------------------------|------------------------------------------------------------------------|------------------------------------------------------------------------------------------------------------------------------------------------------------------------------------|
|                                | 8.8 source                                                             | 8.8 (supplier)                                                                                                                                                                     |
|                                | 8.9 health immune status                                               | 8.9 (state that animals are SPF or SCID etc.)                                                                                                                                      |
| <i>9 housing and husbandry</i> | 9.1 type of facility                                                   | 9.1 (e.g. specific pathogen free)                                                                                                                                                  |
|                                | 9.2 type of cage or housing                                            | 9.2 (e.g. Rack type, cage dimensions etc.)                                                                                                                                         |
|                                | 9.3 bedding material                                                   | 9.3 (e.g. type, supplier etc.)                                                                                                                                                     |
|                                | 9.4 cage companions                                                    | 9.4 (e.g. housed individual or group)                                                                                                                                              |
|                                | 9.5 light/dark cycle                                                   | 9.5 (e.g. 12h light/dark)                                                                                                                                                          |
|                                | 9.6 temperature                                                        | 9.6 (e.g. 23 degree C average)                                                                                                                                                     |
|                                | 9.7 quality of water                                                   | 9.7 (e.g. tap water or distilled water etc.)                                                                                                                                       |
|                                | 9.8 type of food                                                       | 9.8 (e.g. any food supplier name)                                                                                                                                                  |
|                                | 9.9 access to food                                                     | 9.9 (e.g. ad libitum)                                                                                                                                                              |
|                                | 9.10 access to water                                                   | 9.10 (e.g. ad libitum)                                                                                                                                                             |
|                                | 9.11 environmental enrichment                                          | 9.11 (e.g. any environmental enrichment)                                                                                                                                           |
|                                | 9.12 welfare assessment/intervention<br>before/during/after experiment | 9.12 (e.g. any welfare assessment at any time)                                                                                                                                     |
| <i>10 sample size</i>          | 10.1 total number of animal used, no<br>addition required)             | 10.1 (e.g. "In total 120 mice were used"; must state the<br>total number of animals for all in vivo experiments, make<br>sure the authors don't add additional groups/experiments) |
|                                | 10.2 number of animals in each                                         |                                                                                                                                                                                    |

---

|                                 |                                             |                                                            |
|---------------------------------|---------------------------------------------|------------------------------------------------------------|
|                                 | experimental group                          | 10.2 (the exact number, not range for all groups including |
|                                 | 10.3 was sample-size calculation            | sub-groups)                                                |
|                                 | conducted                                   | 10.3 State that sample size calculation was conducted      |
|                                 | 10.4 statistical method for the sample-size | 10.4 Statistical method or explanation of how sample size  |
|                                 | calculation reported or any other           | was determined                                             |
|                                 | explanation provided                        | 10.5 All experiments were repeated at least twice          |
|                                 | 10.5 indicates if experiment was repeated   | 10.6 Three lung sections from each rat were analyzed and   |
|                                 | 10.6 indicates biological or technical      | three randomly selected high-power fields (HPFs) (100×)    |
|                                 | replicates                                  | were examined in each section                              |
|                                 | <hr/>                                       |                                                            |
| <i>11 allocating animals to</i> | 11.1 animals were randomized to groups      | 11.1 (must state that animals were randomized for to at    |
| <i>experimental groups</i>      | 11.2 random sequence generation             | least one set of groups, but does not need to state        |
|                                 | described                                   | randomization for all groups).                             |
|                                 | 11.3 allocation concealment described       | 11.2 (Description of how random sequence was generated)    |
|                                 | 11.4 describes order in which animals in    | 11.3 (Description of how allocation was concealed)         |
|                                 | different experimental groups were          | 11.4 (any description about the order in which animals     |
|                                 | treated                                     | were treated)                                              |
|                                 | 11.5 describes order in which animals in    | 11.5 (any description about the order in which animals     |
|                                 | different experimental groups were          | assessed)                                                  |

---

---

assessed

---

*12 experimental outcomes*

12.1 the total number of outcomes is listed in the methods

12.1 (e.g. “Two primary outcomes and three secondary outcomes were analyzed”.)

12.2 outcomes are identified as being either primary or secondary

12.2 (e.g. “Two primary outcomes and three secondary outcomes were analyzed”)

12.3 at least one outcome measure listed is described

12.3 (e.g. “Two primary outcome measures were analyzed: overall performance on the MWM (days 12-16) and the numbers of surviving CA2-3 cells...”)

---

*13 statistical methods*

13.1 at least one outcome measure is associated with at least one statistical test

13.1 The statistical analysis of cells expressing proinflammatory cytokines was performed using paired t-

13.2 unit of analysis for at least one tests

test.

13.3 describes method or states test used to assess assumptions for statistical

13.2 For each test, the experimental unit was an individual animal.

approach(es)

13.3 Test for normality was performed by Kolmogorov-

13.4 at least one measure of precision for at least one analysis.

Smirnov test. Must state methods or test, not just that data was normal.

13.4 Standard Deviation, Standard Error, Confidence Intervals etc. and which analyses they apply to is reported.

---



|         |                            |                                                                                                                               |                                                                                                                     |
|---------|----------------------------|-------------------------------------------------------------------------------------------------------------------------------|---------------------------------------------------------------------------------------------------------------------|
| Results | <i>14 baseline data</i>    | 14.1 weight for each group                                                                                                    | 14.1 (mean or median)                                                                                               |
|         |                            | 14.2 weight for each group                                                                                                    | 14.2 (range)                                                                                                        |
|         |                            | 14.3 age for each group                                                                                                       | 14.3 (mean or median)                                                                                               |
|         |                            | 14.4 age for each group                                                                                                       | 14.4 (range)                                                                                                        |
|         | <i>15 numbers analysed</i> | 15.1 number of animals in each group for mortality. If mortality is not measure than the first outcome measure reported.      | 15.1 (absolute numbers for each in each analysis, not % or range)                                                   |
|         |                            | 15.2 number of animals in each group for either the first outcome after mortality or if no mortality than the second outcome. | 15.2 (absolute numbers for each in each analysis, not % or range)                                                   |
|         |                            | 15.3 inclusion/exclusion of animals (for any outcome)                                                                         | 15.3 Any statement indicating that either all animals/data were included or that some were excluded for any outcome |
|         |                            | 16.1 either of the outcomes from 15.1 or 15.2 must report a measure of precision.                                             | 16.1 Standard Deviation, Standard Error of the Mean, Confidence Interval; can be displayed graphically.             |
|         |                            | 16.2 either of the outcomes from 15.1 or 15.2 must state what the measure of precision is.                                    | 16.2 Must state what measure of precision is in text or graphic e.g. "error bar are SEM".                           |
|         | <i>17 adverse events</i>   | 17.1 a statement indicating that adverse                                                                                      | 17.1 (e.g. "In four surviving animals, lower extremity                                                              |

|            |                                                                       |                                                                                                                                                                                                                                                                                                                                                     |
|------------|-----------------------------------------------------------------------|-----------------------------------------------------------------------------------------------------------------------------------------------------------------------------------------------------------------------------------------------------------------------------------------------------------------------------------------------------|
|            | events occurred or did not occur for at least one experimental group. | ulcers developed but were effectively treated with local standard triple antibiotic ointment (bacitracin, neomycin, and Polymyxin B) and cohesive bandages". Adverse Event: Any event that is reported (e.g. diarrhea) that is reported but not an outcome measure)                                                                                 |
| Discussion | <i>18 interpretation/scientific implications</i>                      | removed                                                                                                                                                                                                                                                                                                                                             |
|            | <i>19 generalisability/translation</i>                                | removed                                                                                                                                                                                                                                                                                                                                             |
|            | <i>20 funding</i>                                                     | <p>20.1 funding source(s) declared (funding source)</p> <p>20.2 grant etc. must include number (grant #)</p> <p>20.3 roll of funders described</p> <p>20.4 statement of competing/conflict of interest</p>                                                                                                                                          |
|            |                                                                       | <p>20.1 e.g. This work was supported by a grant from CIHR.</p> <p>20.2 e.g. This work was supported by a grant from CIHR (#12345).</p> <p>20.3 e.g. The funders had no role in study design, data collection and analysis, decision to publish, or preparation of the manuscript.</p> <p>20.4 e.g. the authors declare no conflicts of interest</p> |
