# Supplementary material for: The Devil Is in the Details: Incomplete Reporting in Preclinical Animal Research
Source: PubMed Central journal article supplement (PMC5113978; doi:10.1371/journal.pone.0166733), 2016-11-17
Supplement: pone.0166733.s016.pdf [file pone.0166733.s016.pdf]

**Supplementary Table 3. Number and Percentage of Studies Reporting for Each sub-item**

| ARRIVE Section              | ARRIVE <i>item</i>             | sub-item # | # of Studies Reporting | % of Studies Reporting |
|-----------------------------|--------------------------------|------------|------------------------|------------------------|
| Title                       | <i>title</i>                   | 1.1        | 27                     | 57%                    |
|                             |                                | 1.2        | 45                     | 96%                    |
|                             |                                | 1.3        | 47                     | 100%                   |
| <b>Title Summary</b>        |                                | <b>3</b>   | <b>119</b>             | <b>84%</b>             |
| Abstract                    | <i>abstract</i>                | 2.1        | 45                     | 96%                    |
|                             |                                | 2.2        | 43                     | 91%                    |
|                             |                                | 2.3        | 44                     | 94%                    |
|                             |                                | 2.4        | 45                     | 96%                    |
| <b>Abstract Summary</b>     |                                | <b>4</b>   | <b>177</b>             | <b>94%</b>             |
| Introduction                | <i>objectives</i>              | 4.1        | 47                     | 100%                   |
| <b>Introduction Summary</b> |                                | <b>1</b>   | <b>47</b>              | <b>100%</b>            |
| Methods                     | <i>ethical statement</i>       | 5.1        | 39                     | 83%                    |
|                             |                                | 5.2        | 37                     | 79%                    |
|                             |                                | 5.3        | 24                     | 51%                    |
|                             |                                | 5.4        | 1                      | 2%                     |
|                             | <i>study design</i>            | 6.1        | 15                     | 32%                    |
|                             |                                | 6.2        | 38                     | 81%                    |
|                             |                                | 6.3        | 33                     | 70%                    |
|                             |                                | 6.4        | 4                      | 9%                     |
|                             |                                | 6.5        | 2                      | 4%                     |
|                             |                                | 6.6        | 27                     | 57%                    |
|                             |                                | 6.7        | 11                     | 23%                    |
|                             | <i>experimental procedures</i> | 7.1 Model  | 47                     | 100%                   |

---

|            |    |      |
|------------|----|------|
| 7.2 Model  | 25 | 53%  |
| 7.3 Model  | 25 | 53%  |
| 7.4 Model  | 40 | 85%  |
| 7.5 Model  | 47 | 100% |
| 7.6 Model  | 43 | 91%  |
| 7.7 Model  | 35 | 74%  |
| 7.8 Model  | 0  | 0%   |
| 7.9 Model  | 0  | 0%   |
| 7.10 Model | 33 | 70%  |
| 7.11 Model | 24 | 51%  |
| 7.12 Model | 29 | 62%  |
| 7.13 Model | 23 | 49%  |
| 7.14 Model | 0  | 0%   |
| 7.1 MSC    | 45 | 96%  |
| 7.2 MSC    | 19 | 40%  |
| 7.3 MSC    | 43 | 91%  |
| 7.4 MSC    | 45 | 96%  |
| 7.5 MSC    | 31 | 66%  |
| 7.6 MSC    | 33 | 70%  |
| 7.7 MSC    | 46 | 98%  |
| 7.8 MSC    | 46 | 98%  |
| 7.9 MSC    | 42 | 89%  |
| 7.10 MSC   | 47 | 100% |
| 7.11 MSC   | 44 | 94%  |
| 7.12 MSC   | 0  | 0%   |

---

---

|                                     |     |     |      |
|-------------------------------------|-----|-----|------|
| 7.13 MSC                            | 4   | 9%  |      |
| 7.1 Control                         | 45  | 96% |      |
| 7.2 Control                         | 32  | 68% |      |
| 7.3 Control                         | 45  | 96% |      |
| 7.4 Control                         | 40  | 85% |      |
| 7.5 Control                         | 44  | 94% |      |
| 7.6 Control                         | 40  | 85% |      |
| 7.7 Control                         | 0   | 0%  |      |
| 7.1 Euthanasia                      | 38  | 81% |      |
| 7.2 Euthanasia                      | 16  | 34% |      |
| 7.3 Euthanasia                      | 12  | 26% |      |
| <b><i>experimental animals</i></b>  | 8.1 | 47  | 100% |
|                                     | 8.2 | 45  | 96%  |
|                                     | 8.3 | 37  | 79%  |
|                                     | 8.4 | 2   | 4%   |
|                                     | 8.5 | 21  | 45%  |
|                                     | 8.6 | 3   | 6%   |
|                                     | 8.7 | 25  | 53%  |
|                                     | 8.8 | 35  | 74%  |
|                                     | 8.9 | 6   | 13%  |
| <b><i>housing and husbandry</i></b> | 9.1 | 7   | 15%  |
|                                     | 9.2 | 2   | 4%   |
|                                     | 9.3 | 0   | 0%   |
|                                     | 9.4 | 1   | 2%   |
|                                     | 9.5 | 7   | 15%  |

---

|                                     |      |    |     |
|-------------------------------------|------|----|-----|
|                                     | 9.6  | 5  | 11% |
|                                     | 9.7  | 2  | 4%  |
|                                     | 9.8  | 5  | 11% |
|                                     | 9.9  | 12 | 26% |
|                                     | 9.10 | 12 | 26% |
|                                     | 9.11 | 0  | 0%  |
|                                     | 9.12 | 0  | 0%  |
| <b><i>sample size</i></b>           | 10.1 | 11 | 23% |
|                                     | 10.2 | 25 | 53% |
|                                     | 10.3 | 1  | 2%  |
|                                     | 10.4 | 1  | 2%  |
|                                     | 10.5 | 8  | 17% |
|                                     | 10.6 | 27 | 57% |
| <b><i>allocating animals to</i></b> | 11.1 | 22 | 47% |
| <b><i>experimental groups</i></b>   | 11.2 | 0  | 0%  |
|                                     | 11.3 | 0  | 0%  |
|                                     | 11.4 | 0  | 0%  |
|                                     | 11.5 | 0  | 0%  |
| <b><i>experimental outcomes</i></b> | 12.1 | 0  | 0%  |
|                                     | 12.2 | 0  | 0%  |
|                                     | 12.3 | 31 | 66% |
| <b><i>statistical methods</i></b>   | 13.1 | 21 | 45% |
|                                     | 13.2 | 0  | 0%  |
|                                     | 13.3 | 3  | 6%  |
|                                     | 13.4 | 38 | 81% |

|                           |                                |                |             |            |            |
|---------------------------|--------------------------------|----------------|-------------|------------|------------|
| <b>Methods Summary</b>    |                                | <b>87</b>      | <b>1821</b> | <b>45%</b> |            |
| <b>Results</b>            | <i>baseline data</i>           | 14.1           | 5           | 11%        |            |
|                           |                                | 14.2           | 1           | 2%         |            |
|                           |                                | 14.3           | 0           | 0%         |            |
|                           |                                | 14.4           | 0           | 0%         |            |
|                           | <i>numbers analyzed</i>        | 15.1           | 32          | 68%        |            |
|                           |                                | 15.2           | 28          | 60%        |            |
|                           |                                | 15.3           | 2           | 4%         |            |
|                           | <i>outcomes and estimation</i> | 16.1           | 45          | 96%        |            |
|                           |                                | 16.2           | 22          | 47%        |            |
|                           | <i>adverse events</i>          | 17.1           | 0           | 0%         |            |
|                           | <b>Results Summary</b>         |                | <b>10</b>   | <b>135</b> | <b>29%</b> |
|                           | <b>Discussion</b>              | <i>funding</i> | 20.1        | 39         | 83%        |
|                           |                                |                | 20.2        | 33         | 70%        |
| 20.3                      |                                |                | 1           | 2%         |            |
| 20.4                      |                                |                | 27          | 57%        |            |
| <b>Discussion Summary</b> |                                | <b>4</b>       | <b>100</b>  | <b>53%</b> |            |
