# Supplementary material for: The Devil Is in the Details: Incomplete Reporting in Preclinical Animal Research
Source: PubMed Central journal article supplement (PMC5113978; doi:10.1371/journal.pone.0166733), 2016-11-17
Supplement: pone.0166733.s017.pdf [file pone.0166733.s017.pdf]

**Supplementary Table 4. NIH Core Reporting *item* and Matched ARRIVE sub-items**

| <b>NIH <i>item</i></b>                         | <b>ARRIVE sub-items</b>                                                                            | <b>Total # (%) of Studies</b> |
|------------------------------------------------|----------------------------------------------------------------------------------------------------|-------------------------------|
| <b><i>replicates</i></b>                       | 10.5 indicates the experiment was repeated                                                         | 8 (17%)                       |
|                                                | 10.6 indicates repeating of biological or technical replicates                                     | 27 (57%)                      |
| <b><i>statistics</i></b>                       | 13.1 at least one outcome measure is associated with at least one statistical test                 | 21 (77%)                      |
|                                                | 13.2 unit of analysis for at least one test                                                        | 0 (0%)                        |
|                                                | 13.3 describes method or test used to assess assumptions for statistical approach(es)              | 3 (6%)                        |
|                                                | 13.4 at least one measure of precision for at least one analysis                                   | 38 (81%)                      |
| <b><i>randomization</i></b>                    | 11.1 animals were randomized to groups                                                             | 22 (47%)                      |
|                                                | 11.2 random sequence generation described                                                          | 0 (0%)                        |
| <b><i>blinding</i></b>                         | 6.5 blinding of personnel                                                                          | 2 (4%)                        |
|                                                | 6.6 blinding of outcome assessment                                                                 | 27 (57%)                      |
| <b><i>sample-size estimation</i></b>           | 10.3 was a sample-size calculation conducted                                                       | 1 (2%)                        |
|                                                | 10.4 statistical method for the sample-size calculation reported or any other explanation provided | 1 (2%)                        |
| <b><i>inclusion and exclusion criteria</i></b> | 15.3 inclusion/exclusion of animals (for any outcome)                                              | 2 (4%)                        |
